# Supplementary material for: Expression of ZNF695 Transcript Variants in Childhood B-Cell Acute Lymphoblastic Leukemia
Source: PubMed Central journal article supplement (PMC6771147; doi:10.3390/genes10090716), 2019-09-16
Supplement: genes-10-00716-s001.pdf [file genes-10-00716-s001.pdf]

Forward sequence

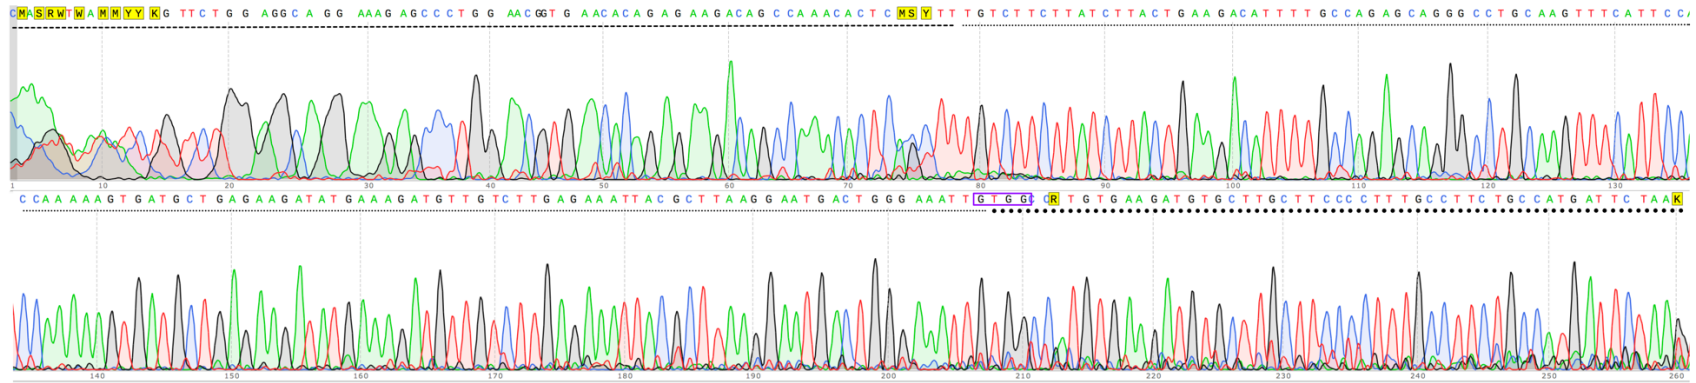

Reverse complement sequence

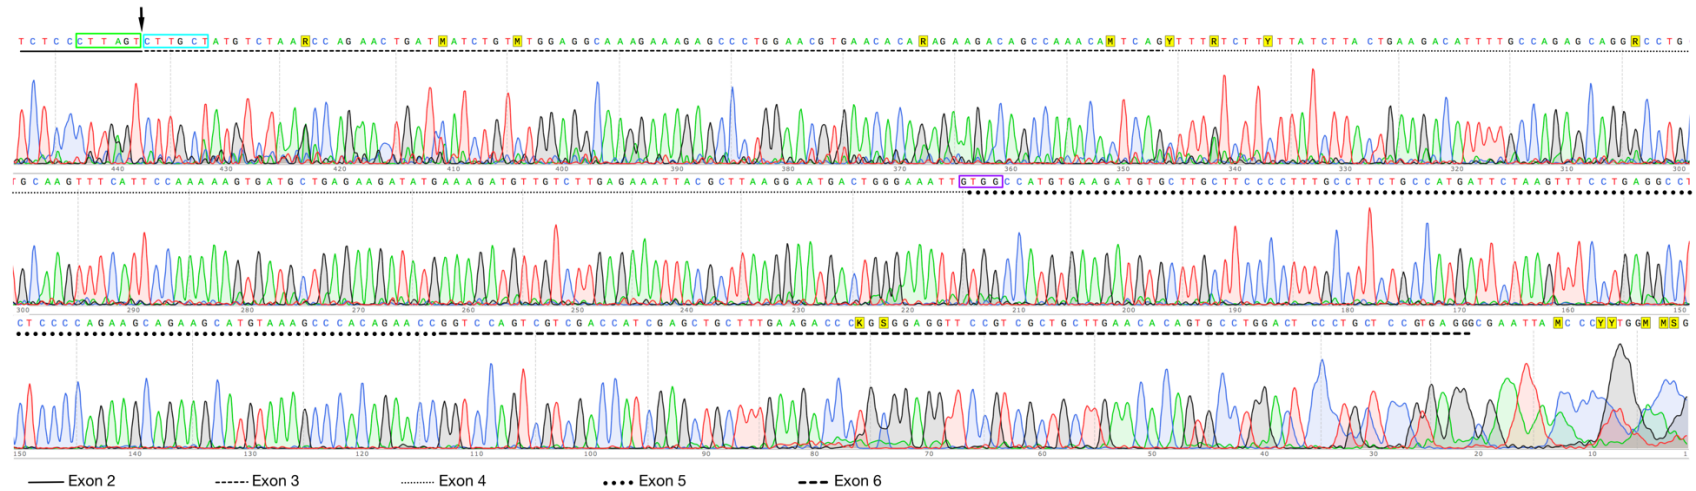

**Figure S1. Representative sequence ZNF695\_TV6.** The electropherogram shows the forward and reverse sequences of the ZNF694 TV6 expressed in the cancer cell lines. The purple box shows the four nucleotides that identify ZNF695\_TV3, the green and blue box show the boundary exon 2 and 3, respectively, and the arrow indicate the SS2. Additionally, the lines below the nucleotides indicate the sequence of each exon.

Forward sequence

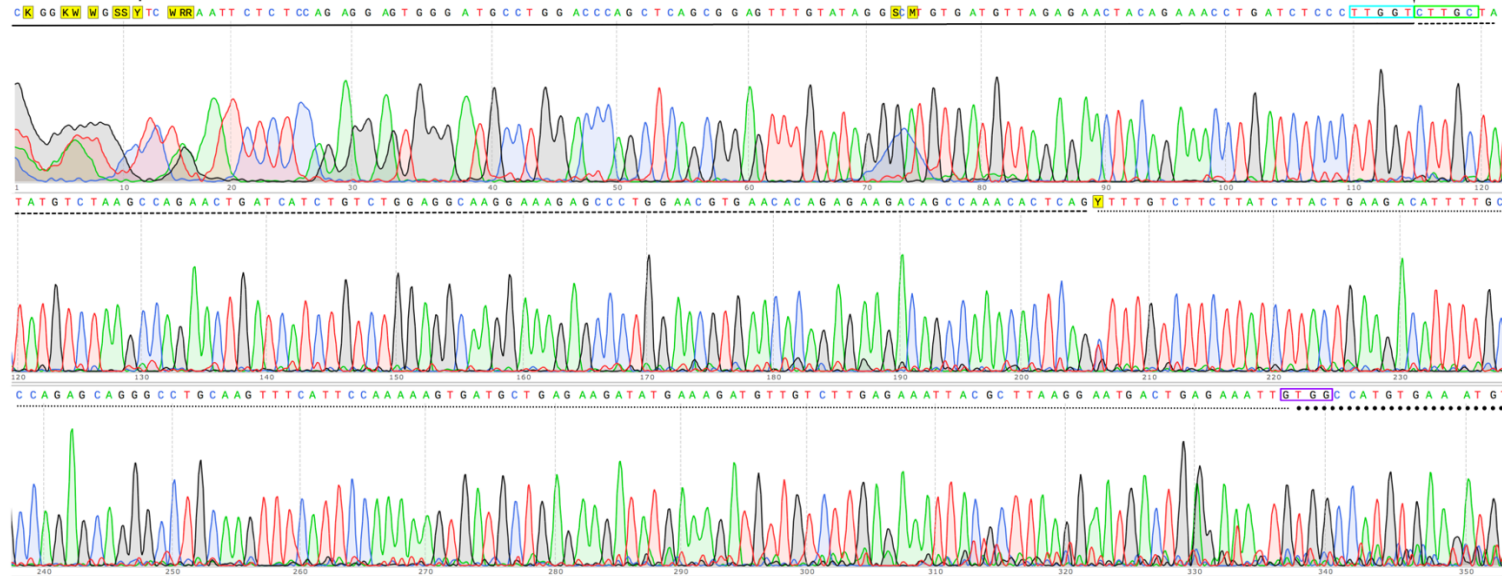

Reverse complement sequence

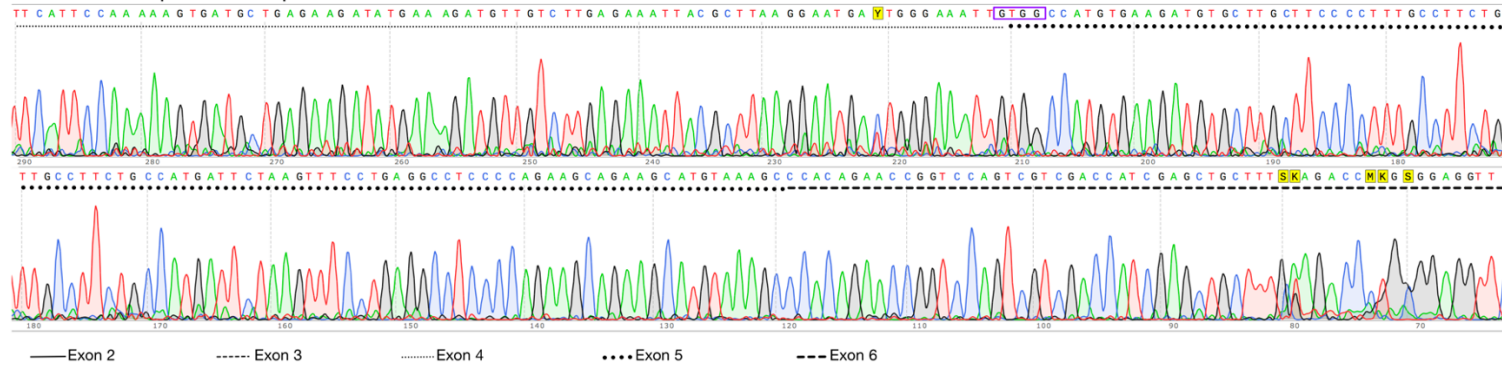

**Figure S2. Representative sequence ZNF695\_TV7.** The electropherogram shows the forward and reverse sequences of the ZNF695 TV7 expressed in the cancer cell lines. The purple box shows the four nucleotides that identify ZNF695\_TV3, the green and blue box show the boundary exon 2 and 3, respectively, and the arrow indicate the SS2. Additionally, the lines below the nucleotides indicate the sequence of each exon.
